# Supplementary material
Source: PubMed Central journal article supplement (PMC3343656)
Supplement: cr201229x1.pdf [file cr201229x1.pdf]

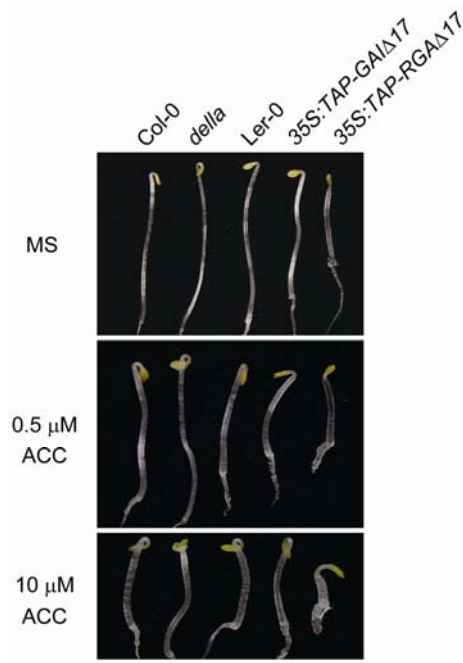

**Supplementary information, Figure S1** The hook phenotype of DELLA-related mutants and transgenic plants.

Seedlings were grown on MS medium containing indicated concentrations of ACC for 3 d.
