# Supplementary material
Source: PubMed Central journal article supplement (PMC3343656)
Supplement: cr201229x2.pdf [file cr201229x2.pdf]

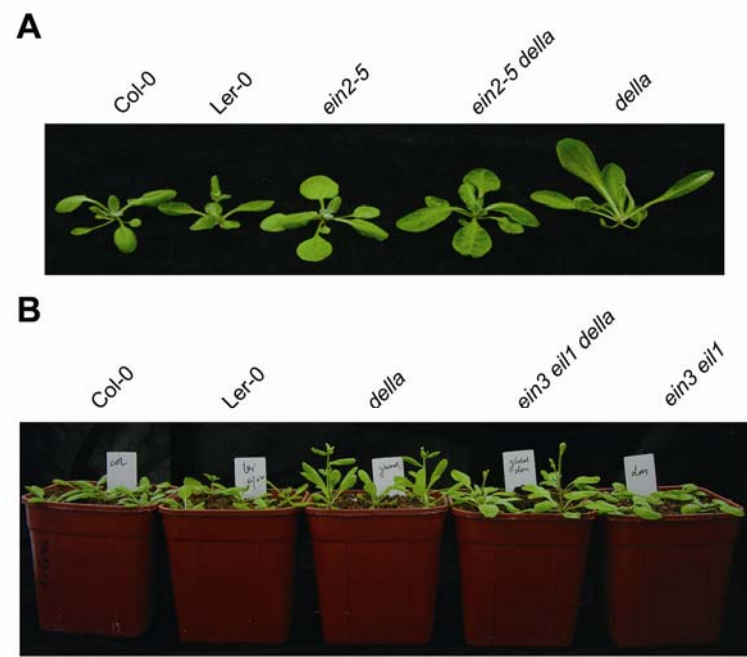

**Supplementary information, Figure S2** *ein2* or *ein3 eil1* suppressed the epinastic leaf phenotype of *della*.

Plants of indicated genotypes grown in soil for 25 d (A) or 30 d (B) were shown. Note that the *della* mutant exhibited an epinastic leaf phenotype (erected rosette leaves), which was not seen in *ein2 della* (A) or *ein3 eil1 della* (B).
