# Supplementary material
Source: PubMed Central journal article supplement (PMC3343656)
Supplement: cr201229x3.pdf [file cr201229x3.pdf]

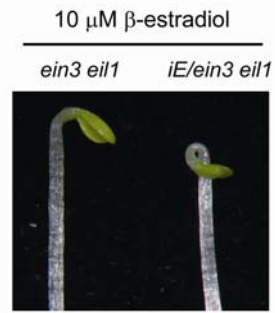

**Supplementary information, Figure S3** Estradiol treatment induced the exaggerated hook curvature in *iE/ein3 eil1*.

3-day-old etiolated seedlings of *iE/ein3 eil1* (a transgenic plant inducibly expressing EIN3-FLAG in the *ein3 eil1* background) grown on 10  $\mu$ M estradiol were shown.
