# Supplementary material
Source: PubMed Central journal article supplement (PMC3343656)
Supplement: cr201229x4.pdf [file cr201229x4.pdf]

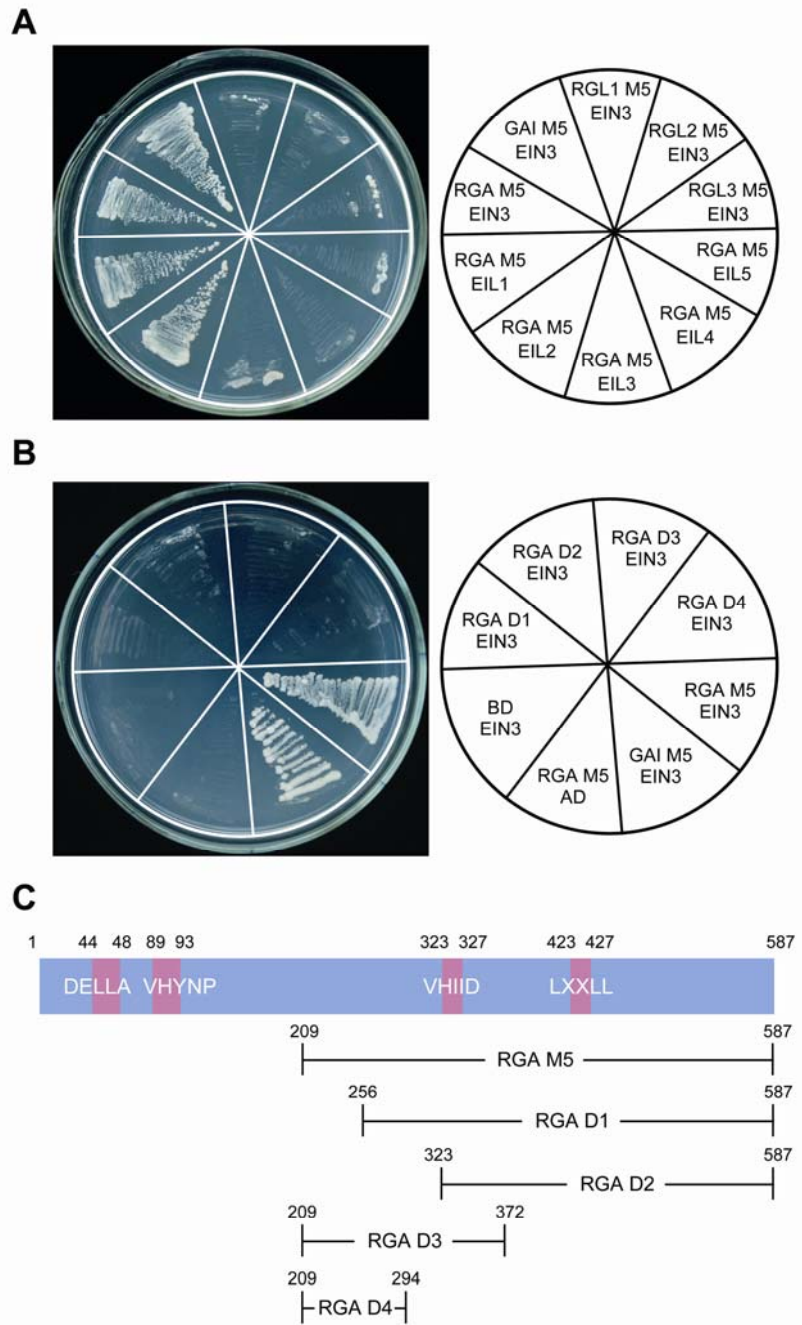

**Supplementary information, Figure S4**

**(A)** RGA/GAI interacted with EIN3/EIL1/EIL2 in yeast cells, while RGL1-RGL3 did not interact with EIN3, and EIL3-EIL5 did not interact with RGA. Full-length EIN3 or EIL1-EIL5 was cloned into pGADT7, and the GRAS domain of RGA, GAI or RGL1-RGL3 was cloned into pGBKT7. The yeast cells were co-transformed with a combination of the indicated plasmids, and transformants were grown on a SD-Leu-Trp-His-Ade plate.

**(B)** The M5 fragment of RGA (aa 209-587) was required for EIN3 interaction in yeast

cells. Transformants with indicated plasmids were grown on a SD-Leu-Trp-His-Ade plate. Note that all other deletion fragments (D1-D4) failed to interact with EIN3 in yeast cells.

(C) RGA deletion constructs. The conserved DELLA, VHIID, and LXXLL motifs are indicated.
