# Supplementary material
Source: PubMed Central journal article supplement (PMC3343656)
Supplement: cr201229x5.pdf [file cr201229x5.pdf]

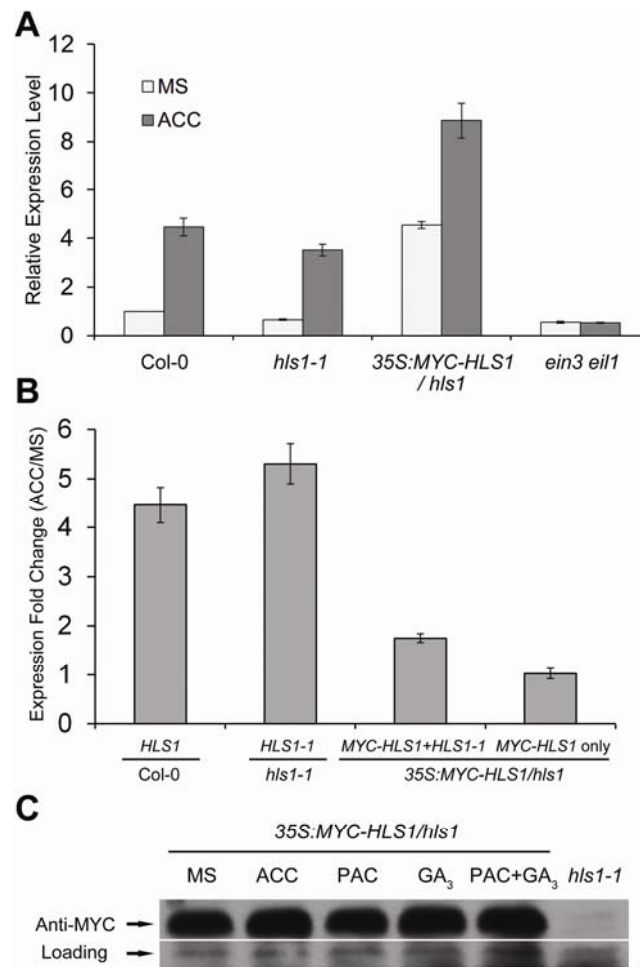

### Supplementary information, Figure S5

- (A)** The qRT-PCR analysis of the ethylene-induced *HLS1* expression in Col-0, *hls1-1*, *35S:MYC-HLS1/hls1* and *ein3 eil1*. 3-day-old etiolated seedlings were treated with or without 100  $\mu$ M ACC for 4 h before total RNA extraction. The *HLS1* expression levels were normalized with the levels of *beta-tubulin*. Mean  $\pm$  s.d., n=3. The experiments were repeated three times with similar results.
- (B)** ACC treatment did not affect the mRNA level of *MYC-HLS1*. The expression fold changes of *HLS1* by ACC treatment were calculated using the data in (A). We designated the relative *HLS1* expression level in *hls1-1* (MS) as M1, in *hls1-1* (ACC) as A1, in *35S:MYC-HLS1/hls1* (MS) as M2 and in *35S:MYC-HLS1/hls1* (ACC) as A2. The *HLS1* expression fold change in *hls1-1* was A1/M1, and that in *35S:MYC-HLS1/hls1* was A2/M2. The effect of ACC on *MYC-HLS1* expression change was calculated as (A2-A1)/(M2-M1), which was close to 1. The error bar

represents the combined standard uncertainty calculated with the standard deviation of each variable in the formulas above.

(C) ACC or GA<sub>3</sub> treatment did not affect the protein level of MYC-HLS1 in *35S:MYC-HLS1/hls1*. 3-day-old etiolated seedlings on MS medium were treated with 100 μM ACC, 10 μM PAC, 100 μM GA<sub>3</sub>, 10 μM PAC + 100 μM GA<sub>3</sub>, respectively, for 4 h before proteins were extracted for Western Blot analysis.
