# Supplementary material
Source: PubMed Central journal article supplement (PMC3343656)
Supplement: cr201229x6.pdf [file cr201229x6.pdf]

**Supplementary information, Table S1 Primers for constructs of yeast two hybrid assays**

| <b>Constructs</b> | <b>Oligonucleotides (5' to 3')</b> |                                         |
|-------------------|------------------------------------|-----------------------------------------|
| RGA M5            | F                                  | CGGGATCCTGGTTGACTCGCA                   |
|                   | R                                  | GTTCTGCAGACTCAGTACGCCGCCG               |
| GAI M5            | F                                  | CGGGATCCTGGTTGACTCGCA                   |
|                   | R                                  | GTTCTGCAGTCTAATTGGTGGAGAG               |
| RGL1 M5           | F                                  | CGGGATCCCTACGCGCTCTGTGG                 |
|                   | R                                  | GCGTCGACTTTATTCCACACGATTGAT             |
| RGL2 M5           | F                                  | CGGGATCCCCGTGGTGCTCGTTGACTCT            |
|                   | R                                  | GTTCTGCAGTGTGATGAGTGGTCGCGTCTGC         |
| RGL3 M5           | F                                  | GCGTCGACCCGTGGTGCTTATCGAGG              |
|                   | R                                  | AACTGCAGTCTACCGCCGCAACTC                |
| RGA D1            | F                                  | CGGGATCCCTATGAGAAAAGTGGCTAC             |
|                   | R                                  | GTTCTGCAGACTCAGTACGCCGCCG               |
| RGA D2            | F                                  | CGGGATCCACGTCATTGATTTCTCGATG            |
|                   | R                                  | GTTCTGCAGACTCAGTACGCCGCCG               |
| RGA D3            | F                                  | CGGGATCCTGGTTGACTCGCA                   |
|                   | R                                  | GTTCTGCAGCCAAC TTCATGAAGATGATCAG        |
| RGA D4            | F                                  | CGGGATCCTGGTTGACTCGCA                   |
|                   | R                                  | GTTCTGCAGTGCATCTGAAGAGTATCGG            |
| EIL1              | F                                  | CGCCCATGGTGATGATGTTTAAACGAGATGGG        |
|                   | R                                  | CGCGGATCCGAACCATATGATAACATCTTGCTG       |
| EIL2              | F                                  | CGCGAATTCATGGATATGTATAACAACAATATAGGGATG |
|                   | R                                  | CTGGGATCCCTGAATCCAAGATGTGGGCAA          |
| EIL3              | F                                  | CGCCCATGGTGGGCGATCTTGCTATGTC            |
|                   | R                                  | CTGGGATCCAGCTCCAACCATGAGAAATC           |
| EIL4              | F                                  | CGCCCATGGTGGTGGAGGTCCAAGATTTAG          |
|                   | R                                  | CTCGGATCCATCTTGAGACATATAAATATCTTTGTCTTC |
| EIL5              | F                                  | CGCGAATTCATGGTGGAAAGTCGAAGAATTGG        |
|                   | R                                  | CTCGGATCCATCGAACATGTATATGTCTTTGTCC      |
| EIN3              | F                                  | CATGCCATGGCAATGATGTTTAAATGAGATG         |
|                   | R                                  | CGGGATCCTTAGAACCATATGGATAC              |
| EIN3 (1-300)      | F                                  | CGGGATCCTCATGATGTTTAAATGAGATG           |
|                   | R                                  | CCGCTCGAGTCTAGCCAAGGACTCTTCTTG          |
| EIN3 (200-500)    | F                                  | CGGGATCCTCCCTCAGAGACGTTTTCCCTTG         |
|                   | R                                  | CCGCTCGAGATTTTCCATGACCATAGAG            |
| EIN3 (428-490)    | F                                  | CGGGATCCTCGACAGTCGCTTACCGTATGGAG        |
|                   | R                                  | CCGCTCGAGTGGACATTTCTGTCTGACATG          |
| EBF1              | F                                  | GGAATTCATATGTCTCAGATCTTTAG              |
|                   | R                                  | CGGGATCCTCAGGAGAGGATGTCACA              |
